# Supplementary material for: Twenty-Four-Hour Urinary Sugars Biomarker in a Vending Machine Intake Paradigm in a Diverse Population
Source: MDPI journal article supplement (doi:10.3390/nu16050610), 2024-02-23
Supplement: s1 [file s1]

Figure S1. Study Flow

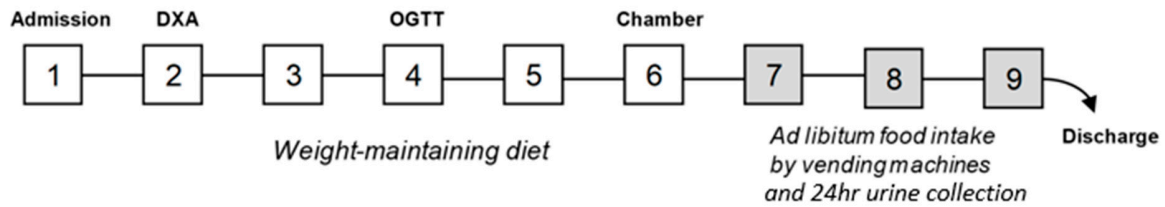

**Table S1. List of 77 Food Items Offered in the Vending Machine Protocol**

| Food Item            |                        |                     |
|----------------------|------------------------|---------------------|
| Pizza                | Oatmeal                | Ham                 |
| Cheeseburger         | Chocolate Pudding      | Green Beans         |
| Orange               | English Muffin         | Potato Salad        |
| Fried Chicken        | Corn Flakes and Milk   | Chicken With Pasta  |
| Eggs                 | Refried Beans          | Popcorn             |
| Baked Potato         | Granola Bar            | Apple Pie           |
| Corn                 | Cup Of Noodles         | Sliced Turkey       |
| Spaghetti with Sauce | Bagel                  | Blueberry Muffins   |
| Chicken Pot Pie      | Rice Krispies and Milk | KitKat Bar          |
| Barbecue Wings       | Pinto Beans            | Nestle Crunch       |
| French Toast         | Peanuts                | Cheez-Its           |
| Beef Stew            | Sausage McMuffin       | Tortilla Chips      |
| Sausage              | Ritz Crackers          | Chicken Noodle Soup |
| Reese's Cups         | Rice Krispies Treats   | Crackers            |
| Cheddar Cheese       | Cinnamon Bun           | Pretzels            |
| Chili With Beans     | Cottage Cheese         | Baby Ruth           |
| Pancakes             | Chocolate Donut        | Spinach             |
| Apples               | Jello                  | Pork and Beans      |
| Chicken Nuggets      | Apple Sauce            | Bologna             |
| Stuffed Baked Potato | Croissant              | Raisins             |
| Potato Chips         | Yogurt                 | Fig Newtons         |
| Peanut M and M's     | Corned Beef Hash       | Gummy Bears         |
| Cooked Rice          | Cheesecake             | Fruit Roll-Ups      |
| Tater Tots           | Macaroni Salad         | Mushroom Soup       |
| Peaches              | Canned Tuna            | Sugar Wafers        |
| Doritos              | Fudge Cookies          |                     |
